# Supplementary material for: Frugivores enhance potential carbon recovery in fragmented tropical landscapes
Source: Research Square preprint supplement (doi:10.21203/rs.3.rs-3245772/v1), 2023-09-20
Supplement: Supplementary file 1 [file 40a2b25230f326c69160250f.pdf]

1  
2  
3  
4  
5  
6  
7  
8  
9  
10  
11  
12  
13  
14  
15  
16  
17  
18  
19  
20  
21  
22  
23  
24

**FRUGIVORES ENHANCE POTENTIAL CARBON RECOVERY IN FRAGMENTED TROPICAL LANDSCAPES**

**SUPPLEMENTAL MATERIAL**

**SM1. Hierarchical model code for frugivory interactions**

**SM2. Hierarchical model code for bird's movement**

**SM1. Hierarchical model code for gut passage time interactions**

**Table S1. Convergence and model performance.** Rhat<1.1 shows the percentage of chains converging at each model. Rturj only applied to binary variables

| Model                  | Rhat<1.1 | Waic    | Rturj | R2 Gelma |
|------------------------|----------|---------|-------|----------|
| Frugivory interactions | 98.00%   | 1796.58 | 0.19  | 0.39     |
| Gut passage time       | 80.00%   | -131.23 |       | 0.93     |

**Table S2. Model coefficients.** In columns the exploratory variables. In rows the respond variables. \* represent significant variables with 90% and \*\* with 95% of confidence.

|                          | <i>Forest cover</i>   |                   | <i>Forest isolation</i> |         | <i>Body mass (log)</i> |         | <i>Gape size</i> |         | <i>Distance to forest edge (log)</i> |         |  |
|--------------------------|-----------------------|-------------------|-------------------------|---------|------------------------|---------|------------------|---------|--------------------------------------|---------|--|
|                          | coef                  | p-value           | coef                    | p-value | coef                   | p-value | coef             | p-value | coef                                 | p-value |  |
| <i>Seed deposition</i>   | intercept             | 689.97 <0.001**   | 689.97 <0.001**         |         | 11.01 <0.001**         |         | 9.02 <0.001**    |         | 2851.706 <0.001**                    |         |  |
|                          | x                     | -2144.54 0.39     | -2144.54 0.01**         |         | -1.86 <0.001**         |         | -0.44 <0.001**   |         | -1251.08 <0.001**                    |         |  |
|                          | x2                    | 583.54 0.012**    | 583.54 0.1*             |         |                        |         |                  |         |                                      |         |  |
|                          | x3                    | -248.16 0.049*    | -248.16 0.049**         |         |                        |         |                  |         |                                      |         |  |
|                          | Pseudo-R2 conditional | 0.76              |                         | 0.76    |                        | 0.22    |                  | 0.23    |                                      | 0.67    |  |
|                          | Pseudo-R2 marginal    |                   |                         |         |                        | 0.16    |                  | 0.16    |                                      | 0.50    |  |
| <i>Biomass potential</i> | intercept             | 1790.15 <0.001**  | 1790.15 <0.001**        |         | 3.29 0.005**           |         | 3.97 0.005**     |         | 1.64 <0.001**                        |         |  |
|                          | x                     | 1214.07 <0.001**  | -2124.35 <0.001**       |         | 0.34 0.34048           |         | 0.05 0.67395     |         | -0.72 <0.001**                       |         |  |
|                          | x2                    | -1384.14 <0.001** | -995.65 <0.001**        |         |                        |         |                  |         |                                      |         |  |
|                          | Pseudo-R2 conditional | 0.328             |                         | 0.545   |                        | 0.149   |                  | 0.232   |                                      | 0.557   |  |
|                          | Pseudo-R2 marginal    |                   |                         |         |                        | 0.007   |                  | 0.003   |                                      | 0.435   |  |

25 **Table S3. Inflection points for predicted models.** Threshold values are in the same units as the co-  
 26 variables.

| Predicted variable | Co-variable        | Threshold |
|--------------------|--------------------|-----------|
| Number of seeds    | Forest cover       | 0.38      |
| Number of seeds    | Forest isolation   | 112.7     |
| Number of seeds    | Distance to forest | 112.6     |
| Potential biomass  | Forest cover       | 0.39      |
| Potential biomass  | Forest isolation   | 56.0      |
| Potential biomass  | Distance to forest | 112.6     |

27

28

29 **Table S4. Random effects for fitted models for seed dispersal and biomass restoration against**  
 30 **body mass and gape size.** In bold we highly the change on tendency

| <i>Percentage forest cover</i> | <b>Biomass</b> |             |              |             | <b>Seed dispersal</b> |             |              |             |
|--------------------------------|----------------|-------------|--------------|-------------|-----------------------|-------------|--------------|-------------|
|                                | Body mass      |             | Gape size    |             | Body mass             |             | Gape size    |             |
|                                | (Intercept)    | log(Body)   | (Intercept)  | Gape        | (Intercept)           | log(Body)   | (Intercept)  | Gape        |
| <i>0.09</i>                    | 2.78           | -1.01       | 0.91         | -0.15       | 1.03                  | -0.49       | 0.91         | -0.15       |
| <i>0.121</i>                   | 2.85           | -1.04       | 0.93         | -0.16       | 1.19                  | -0.55       | 0.93         | -0.16       |
| <i>0.185</i>                   | 2.08           | -0.80       | 0.76         | -0.13       | 0.72                  | -0.40       | 0.76         | -0.13       |
| <i>0.217</i>                   | 1.88           | -0.70       | 0.73         | -0.12       | 0.78                  | -0.38       | 0.73         | -0.12       |
| <i>0.315</i>                   | 2.30           | -0.83       | 0.80         | -0.13       | 0.99                  | -0.42       | 0.80         | -0.13       |
| <i>0.391</i>                   | 1.03           | -0.49       | 0.84         | -0.14       | 0.61                  | -0.33       | 0.84         | -0.14       |
| <i>0.475</i>                   | <b>-0.28</b>   | <b>0.10</b> | <b>-0.52</b> | <b>0.09</b> | <b>-0.27</b>          | <b>0.20</b> | <b>-0.52</b> | <b>0.09</b> |
| <i>0.55</i>                    | <b>-4.81</b>   | <b>1.78</b> | <b>-1.67</b> | <b>0.28</b> | <b>-2.14</b>          | <b>0.94</b> | <b>-1.67</b> | <b>0.28</b> |
| <i>0.588</i>                   | <b>-3.85</b>   | <b>1.48</b> | <b>-1.43</b> | <b>0.24</b> | <b>-1.39</b>          | <b>0.70</b> | <b>-1.43</b> | <b>0.24</b> |
| <i>0.61</i>                    | <b>-3.98</b>   | <b>1.51</b> | <b>-1.35</b> | <b>0.23</b> | <b>-1.51</b>          | <b>0.73</b> | <b>-1.35</b> | <b>0.23</b> |

31

32

33

34
